# Supplementary material
Source: publisher site journal article supplement (https://www.dovepress.com/article/576435)
Supplement: Supplementary file 1 [file 576435%20Revised%20Supplementary%20Figure%201.docx]

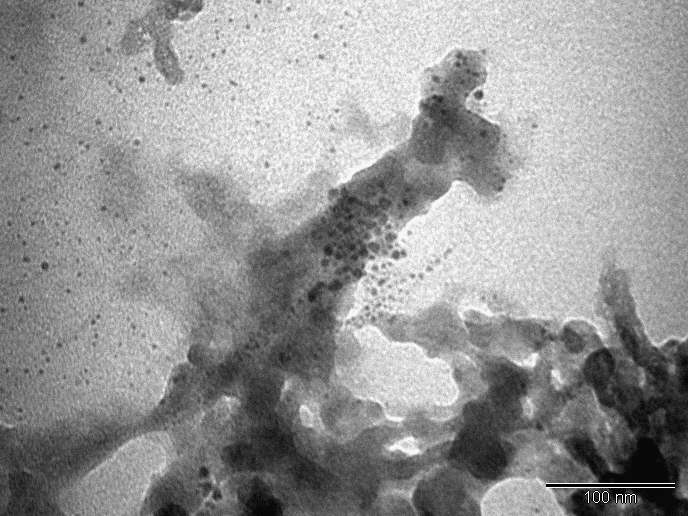

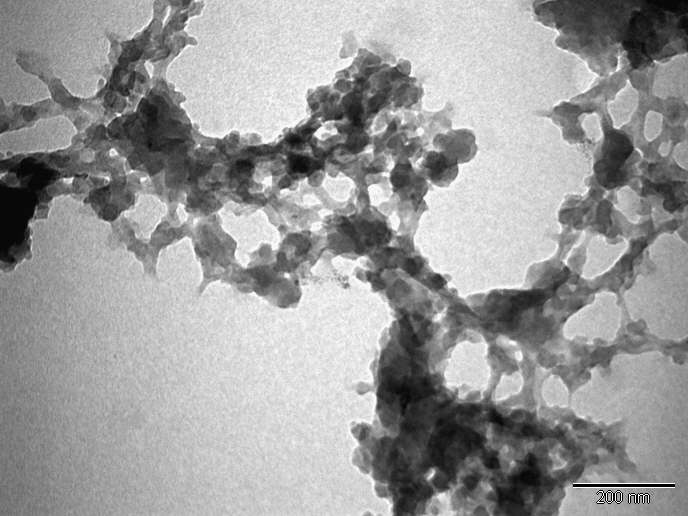

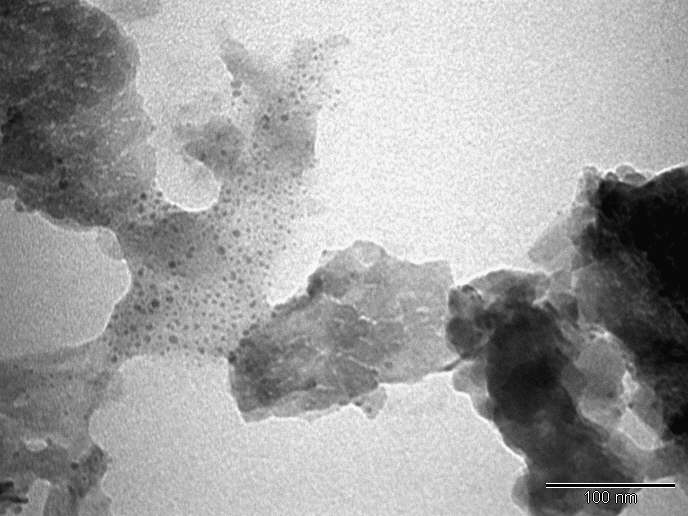

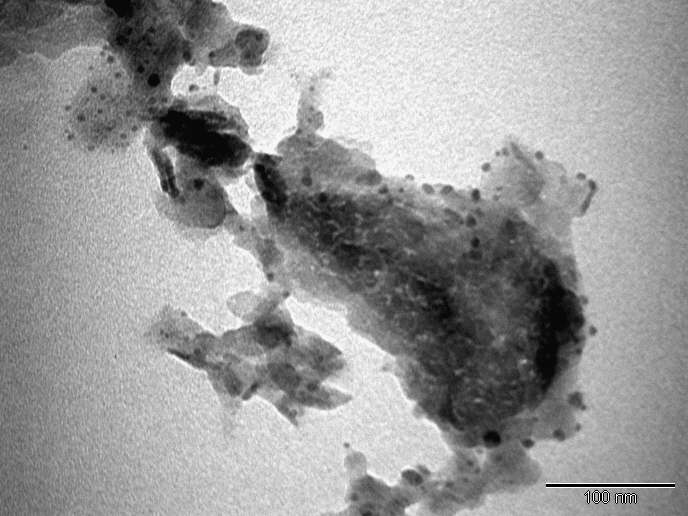

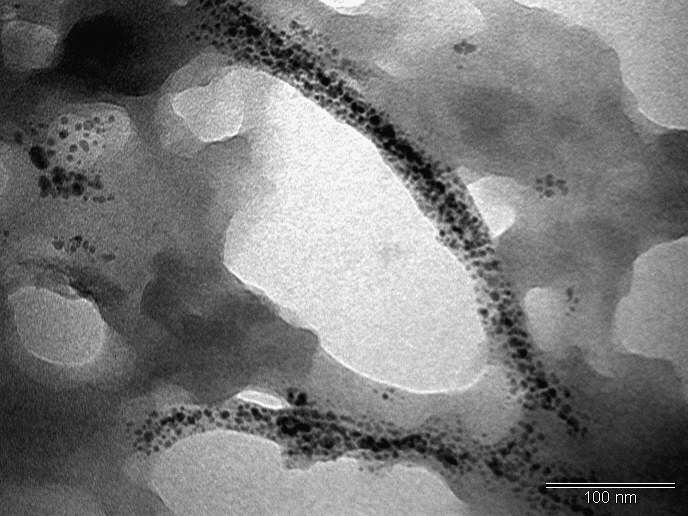

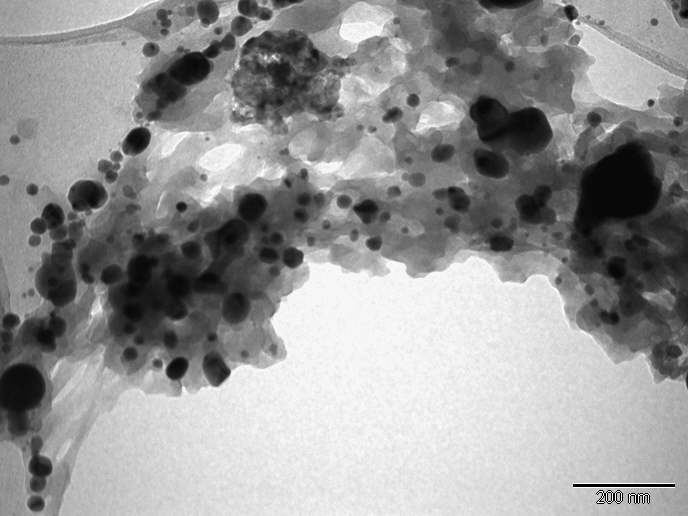

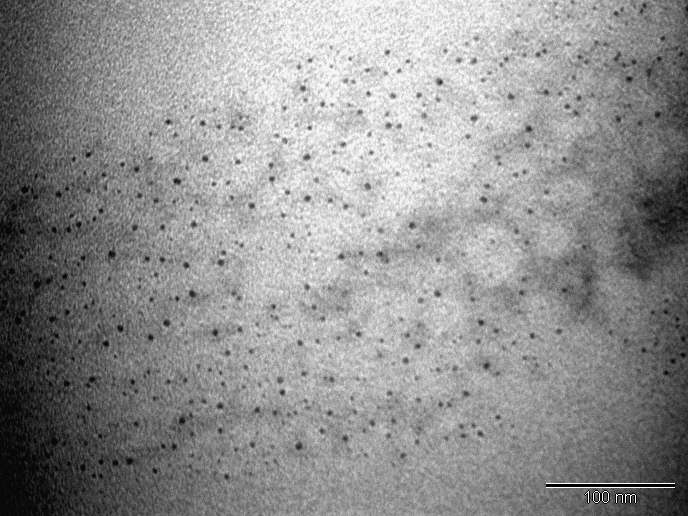

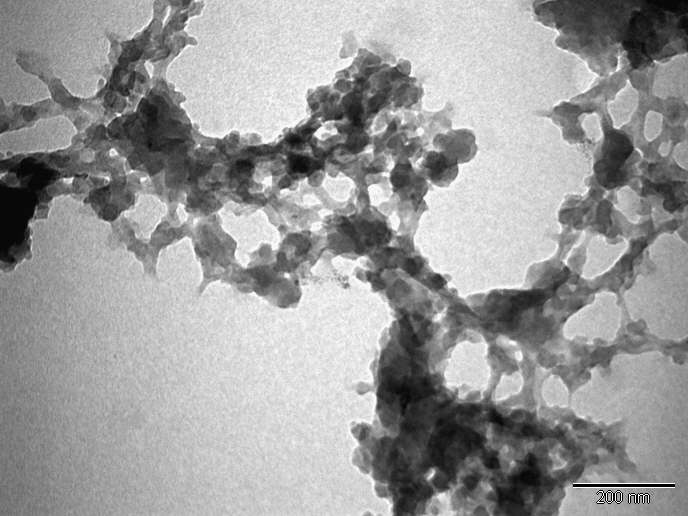

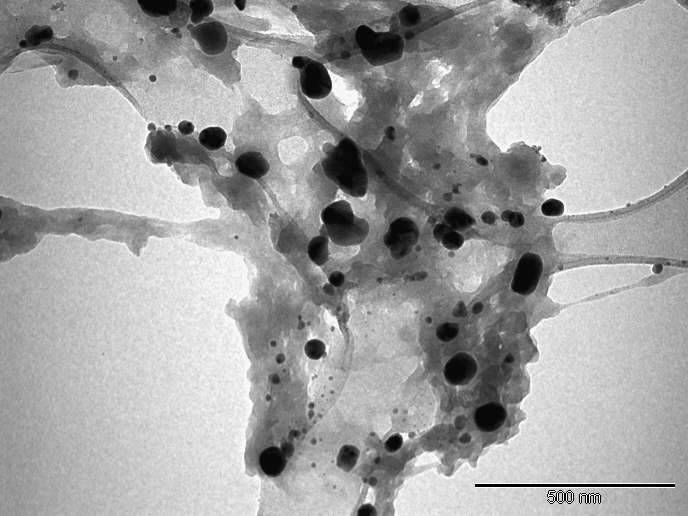

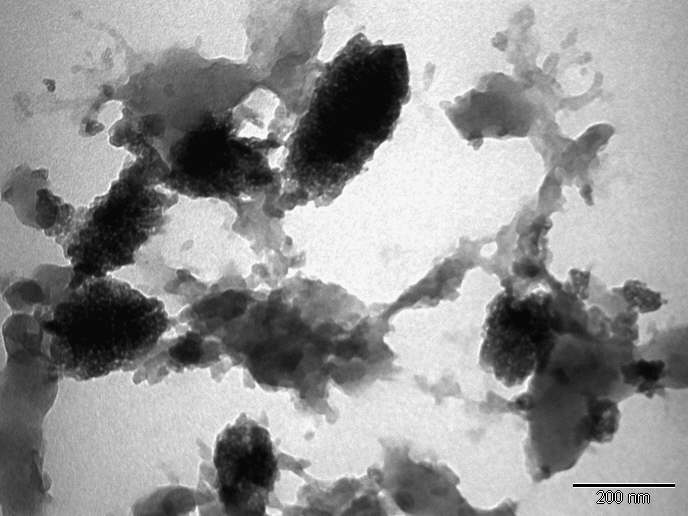


**j**

**i**

**h**

**g**

**f**

**e**

**d**

**c**

**b**

**a**

Supplementary Figure 1: TEM of series A: a) GLH-1 b) GLH-2 c) GLH-3 d) GLH-4 e) GLH-5 and series B: f) GLM-1 g) GLM-2 h) GLM-3 i) GLM-4 j) GLM-5
